# Supplementary material for: A genetic variant in SLC30A2 causes breast dysfunction during lactation by inducing ER stress, oxidative stress and epithelial barrier defects
Source: PubMed Central journal article supplement (PMC5824919; doi:10.1038/s41598-018-21505-8), 2018-02-23
Supplement: 41598_2018_21505_MOESM1_ESM.pdf [file 41598_2018_21505_MOESM1_ESM.pdf]

**A genetic variant in *SLC30A2* causes breast dysfunction during lactation by inducing ER stress, oxidative stress and epithelial barrier defects**

Sooyeon Lee<sup>1</sup>, Yandong Zhou<sup>1</sup>, Donald L. Gill<sup>1</sup>, and Shannon L. Kelleher\*<sup>1, 2, 3</sup>

Departments of <sup>1</sup>Cellular and Molecular Physiology, <sup>2</sup>Pharmacology and <sup>3</sup>Surgery, Penn State Hershey College of Medicine, Hershey, PA, 17033

<sup>a</sup> Present address: Department of Medicine, Stanford University, Stanford, CA 94305

<sup>b</sup> Present address: Department of Biomedical and Nutritional Sciences, University of Massachusetts Lowell, Lowell, MA, 01854

\*Corresponding author [shannon\\_kelleher@uml.edu](mailto:shannon_kelleher@uml.edu)

## **SUPPLEMENTARY INFORMATION**

### **Supplementary Table S1. Macronutrient concentrations in breast milk from women harboring wild-type ZnT2 (T<sup>288</sup>) or the ZnT2 variant (S<sup>288</sup>).**

Macronutrient (protein, lactose and fat) concentrations were measured in breast milk from women harboring wild-type ZnT2 (T<sup>288</sup>) or the ZnT2 variant with a threonine to serine substitution (S<sup>288</sup>). Protein (g/L) was measured by Dumas analysis, lactose (g/dL) was measured using Lactose Assay kit, and fat (%) was determined by creatatocrit. Data represent mean concentration  $\pm$  SD from n=4-5 samples/group; p-value obtained by Student's t-test.

### **Supplementary Figure S1. Confirmation of ER-ZAPCY1 sensor localization in cultured MECs.**

Representative confocal images of the ER Zn sensor, ER-ZAPCY1 (green) and the ER marker, calnexin (red). Merged images (yellow) illustrate co-localization of ER-ZAPCY1 and calnexin in MECs. Nuclei were counterstained with DAPI (blue). Note co-localization of ER-ZAPCY1 and calnexin, validating this ER sensor in our cell model.

### **Supplementary Figure S2. Gel and immunoblots relating to Figure 1 are shown.**

- (a) Full-length zymography gel of MMP-2 activity.
- (b) Membrane was cut in half prior to immunoblot to probe for Mucin-4 (top) and 4-HNE (bottom).
- (c) Membrane was cut in half prior to immunoblot to probe for Endoplasmin.
- (d) Replicate gel stained with Coomassie Blue.

### **Supplementary Figure S3. Immunoblots relating to Figure 2 are shown.**

- (a) Full-length blot probed for Endoplasmin.
- (b) Membrane was cut in half and re-probed for  $\beta$ -actin.

### **Supplementary Figure S4. Immunoblots relating to Figure 3 are shown.**

- (a) Full-length blot probed for p-STAT3.
- (b) Membrane was cut in half to re-probe for total STAT3 (top) and  $\beta$ -actin (bottom).

**Supplementary Figure S5. Immunoblots relating to Figure 4 are shown.**

(a) Full-length blot probed for ZO-1.

(b) Membrane stained with Ponceau.

**Supplementary Figure S6. Immunoblots relating to Figure 5 are shown.**

(a) Full-length blot probed for p-serine.

(b) Full-length blot probed for HA.

Supplementary Table S1

| Macronutrients** | T <sup>288</sup> | S <sup>288</sup> | p-value |
|------------------|------------------|------------------|---------|
| Protein (g/L)    | 17.2 ± 3.2       | 21.2 ± 4.2       | 0.1232  |
| Lactose (g/dL)   | 7.1 ± 1.0        | 7.2 ± 2.4        | 0.9215  |
| Fat (%)          | 8.1 ± 3.3        | 7.7 ± 1.8        | 0.8486  |

\*\*Units are different for each macronutrient.

Supplementary Figure S1

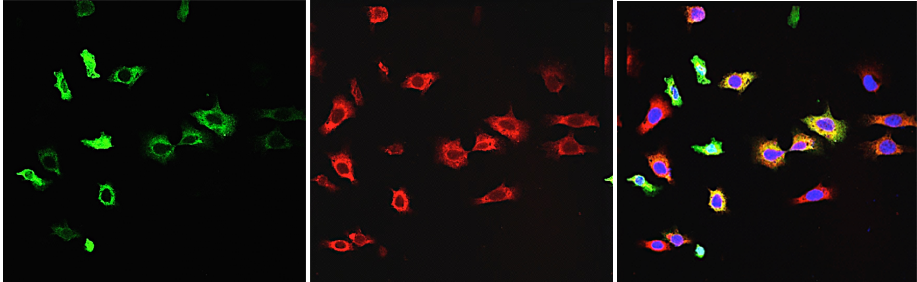

ER-ZapCY1 / Calnexin / DAPI / Merge

Supplementary Figure S2

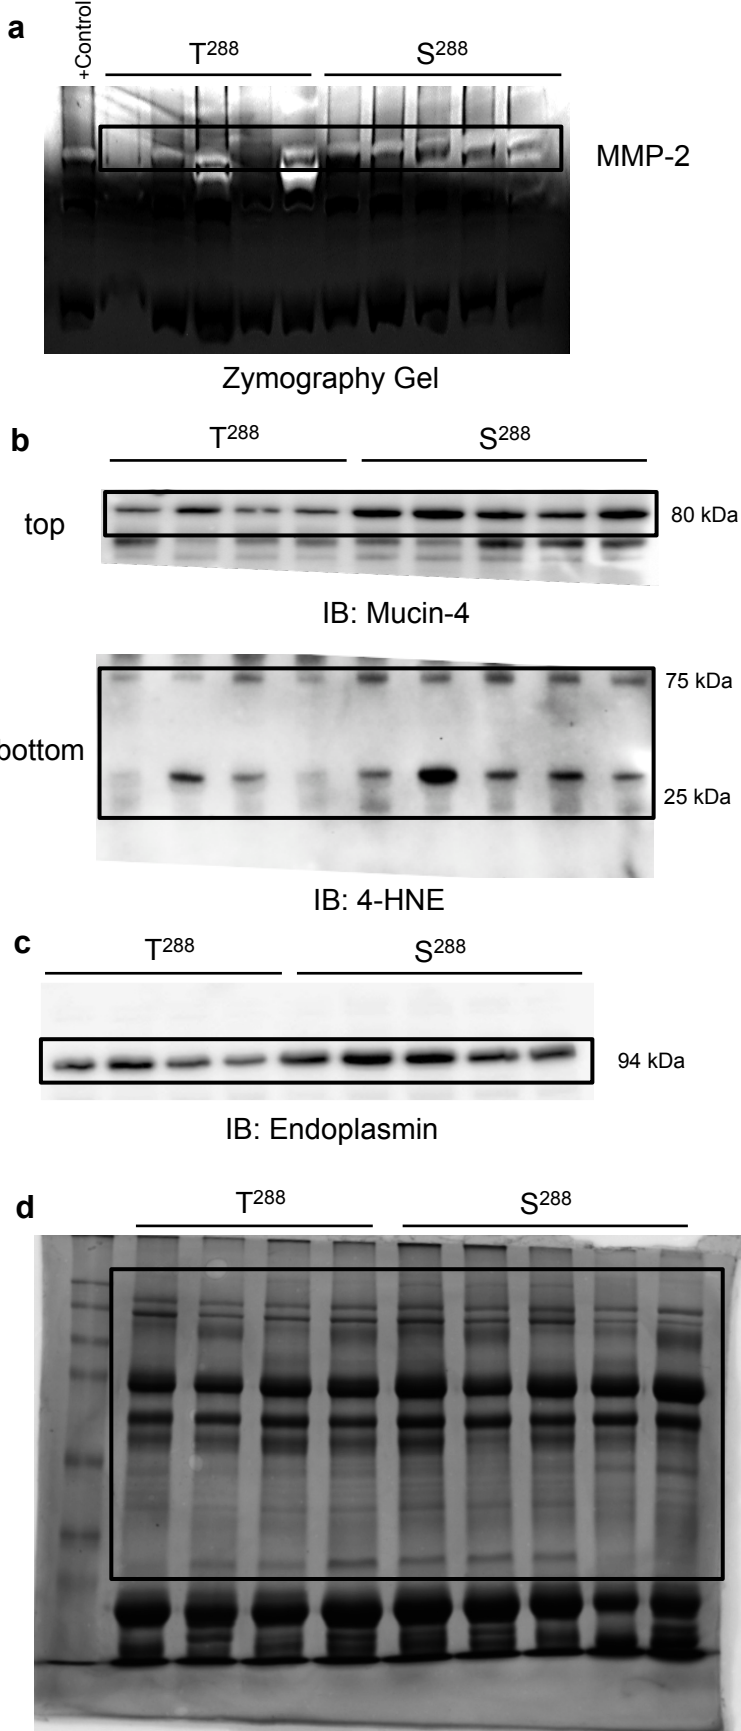

Supplementary Figure S3

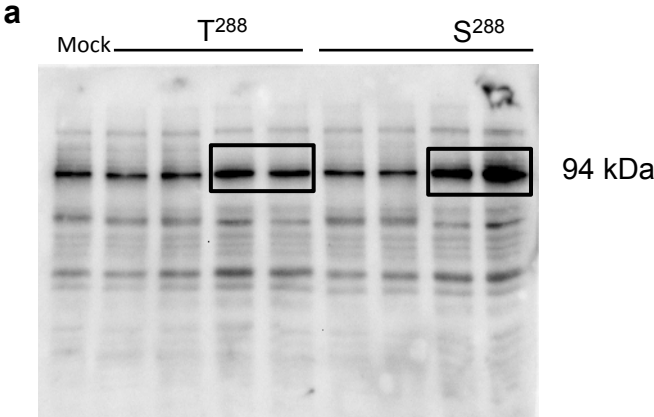

IB: Endoplasmic reticulum chaperone protein

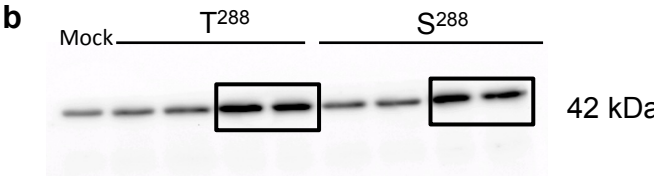

IB:  $\beta$ -actin

Supplementary Figure S4

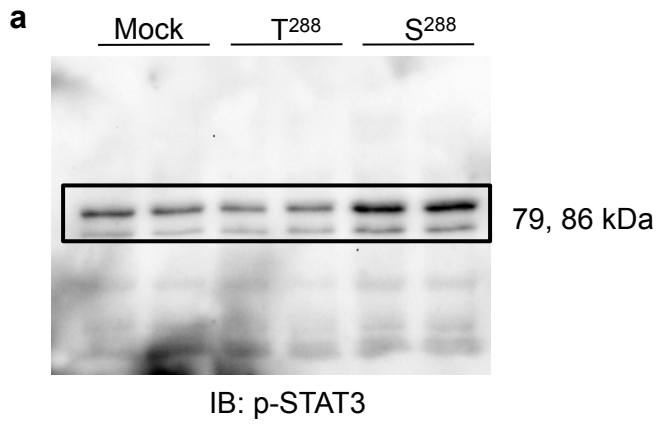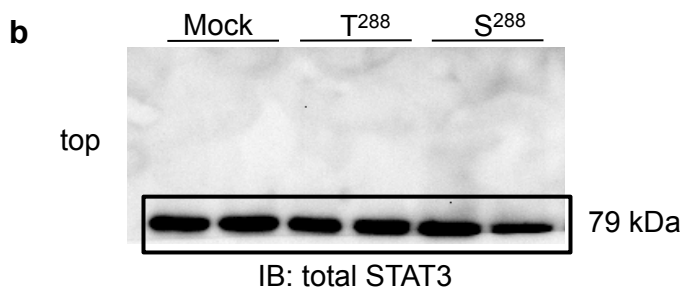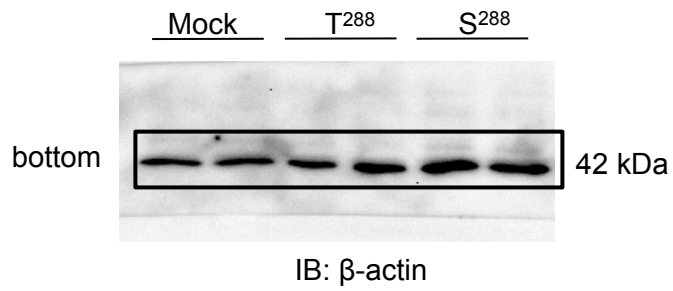



Supplementary Figure S5

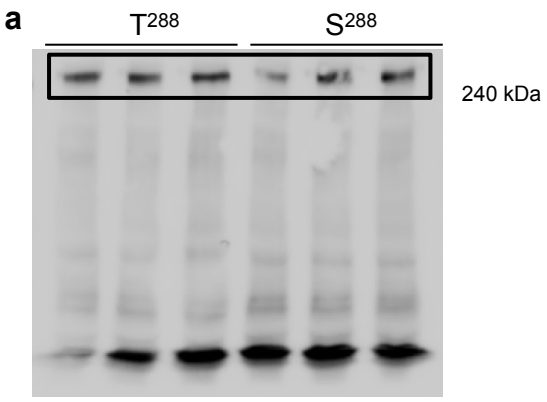

IB: ZO-1

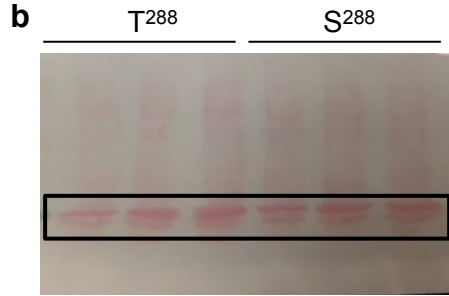

Ponceau Stain

Supplementary Figure S6

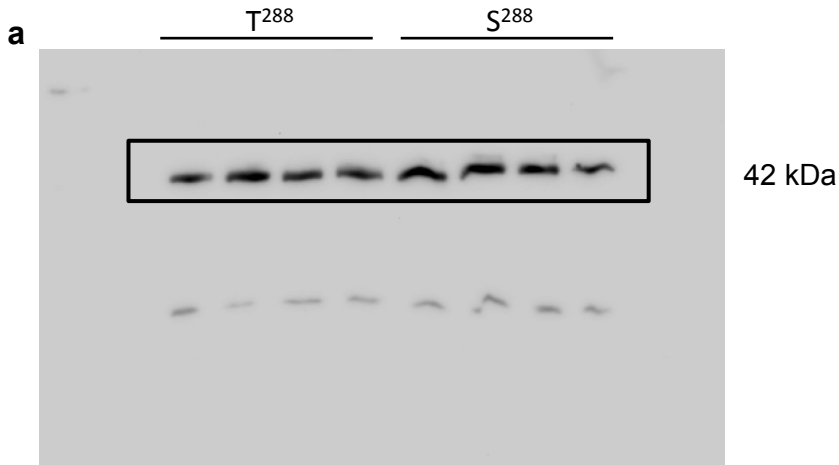

IB: p-serine

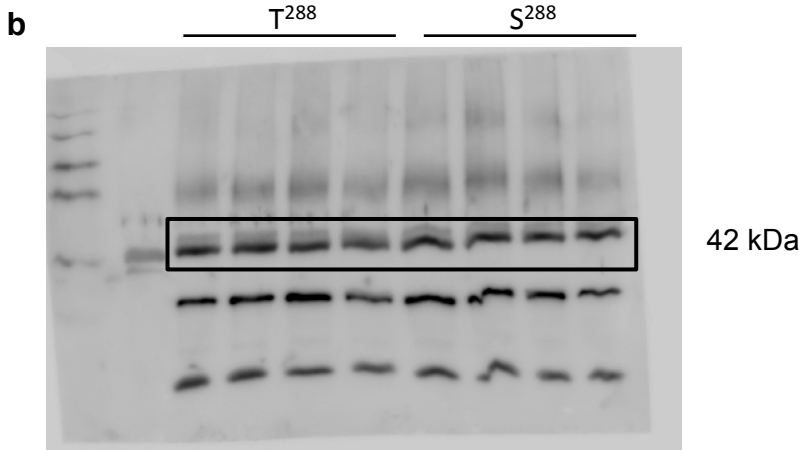

IB: HA
